# Supplementary material
Source: Springer Nature journal article supplement (https://www.springerprofessional.de/resource/supplementary/13638_2012_613_MOESM11_ESM.pdf/11898360)

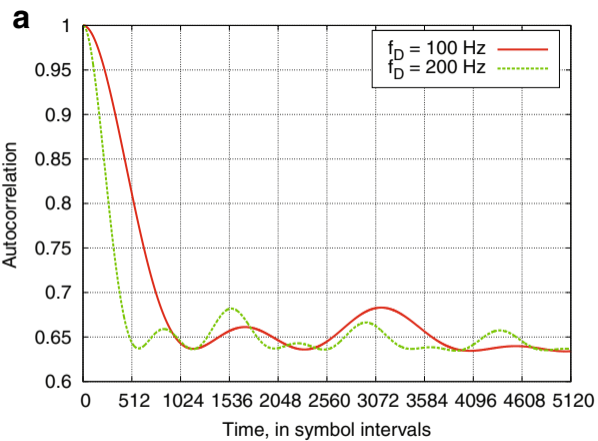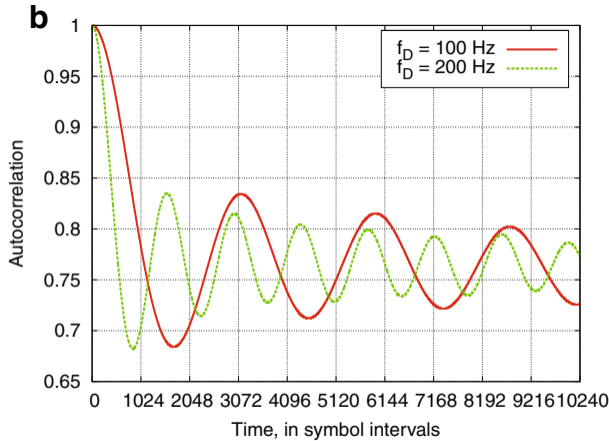

Supplement: MOESM11 [file 11898360]
